# Supplementary material
Source: PubMed Central journal article supplement (PMC6989704)
Supplement: 13280_2019_1249_MOESM1_ESM.pdf [file 13280_2019_1249_MOESM1_ESM.pdf]

**Ambio**

Electronic Supplementary Material

*This supplementary material has not been peer reviewed*

Title: **Satellite-based decadal change assessments of pan-Arctic environments**

Liza K. Jenkins, Tom Barry, Karl R. Bosse, William S. Currie, Tom Christensen, Sara Longan, Robert A. Shuchman, Danielle Tanzer, Jason J. Taylor

**Appendix S1.** Presented here are the 95% confidence intervals for the rates of change for the standardized data.

|             | Land Surface Temp | Snow Cover      | NDVI             | Green Up            | Senescence                 | Season Length   | Burned Area     |
|-------------|-------------------|-----------------|------------------|---------------------|----------------------------|-----------------|-----------------|
| Pan-Arctic  | (0.005, 0.194)    | (-0.172, 0.092) | (0.106, 0.225)   | (-0.253, 0.004)     | (-0.207, 0.083)            | (-0.005, 0.252) | (-0.093, 0.171) |
| Subzone A   | (0.065, 0.218)    | (-0.123, 0.145) | (0.087, 0.223)   | (-0.154, 0.146)     | (-0.107, 0.189)            | (-0.063, 0.221) | NA              |
| Subzone B   | (0.006, 0.194)    | (-0.154, 0.113) | (0.076, 0.220)   | (-0.236, 0.038)     | (-0.159, 0.141)            | (0.009, 0.258)  | NA              |
| Subzone C   | (-0.023, 0.178)   | (-0.189, 0.069) | (-0.020, 0.180)  | (-0.259, -0.010)    | (-0.253, 0.003)            | (-0.079, 0.210) | NA              |
| Subzone D   | (0.015, 0.198)    | (-0.206, 0.044) | (0.068, 0.219)   | (-0.235, 0.040)     | (-0.208, 0.082)            | (-0.031, 0.240) | (-0.132, 0.136) |
| Subzone E   | (0.033, 0.207)    | (-0.176, 0.087) | (0.089, 0.223)   | (-0.255, -0.002)    | (-0.177, 0.121)            | (0.029, 0.266)  | (-0.189, 0.069) |
|             |                   |                 |                  |                     |                            |                 |                 |
|             | Chlorophyll       | CDOM            | Sea Surface Temp | Sea Ice (2003-2017) | Total Primary Productivity |                 |                 |
| Pan-Arctic  | (-0.035, 0.211)   | (-0.045, 0.202) | (-0.059, 0.196)  | (-0.275, -0.062)    | (0.109, 0.282)             |                 |                 |
| High Arctic | (-0.027, 0.216)   | (-0.047, 0.204) | (-0.016, 0.222)  | (-0.277, -0.068)    | (0.071, 0.277)             |                 |                 |
| Low Arctic  | (-0.029, 0.215)   | (-0.054, 0.199) | (-0.037, 0.210)  | (-0.176, 0.123)     | (0.035, 0.268)             |                 |                 |
| Sub Arctic  | (-0.087, 0.176)   | (-0.048, 0.203) | (-0.051, 0.201)  | (-0.062, 0.222)     | (-0.045, 0.232)            |                 |                 |
